# Serum Insulin, Obesity, and the Incidence of Type 2 Diabetes in Black and White Adults

The Atherosclerosis Risk in Communities Study: 1987–1998

MERCEDES R. CARNETHON, PHD<sup>1</sup>  
LATHA P. PALANIAPPAN, MD<sup>1</sup>  
CECIL M. BURCHFIEL, PHD<sup>2</sup>

FREDERICK L. BRANCATI, MD<sup>3</sup>  
STEPHEN P. FORTMANN, MD<sup>1</sup>

**OBJECTIVE** — In this study, we tested the hypothesis that fasting serum insulin is higher in nonobese black adults than in white adults and that high fasting insulin predicts type 2 diabetes equally well in both groups.

**RESEARCH DESIGN AND METHODS** — At the baseline examination (1987–1989) of the Atherosclerosis Risk in Communities Study, fasting insulin and BMI were measured in 13,416 black and white men and women without diabetes. Participants were examined at years 3, 6, and 9 for incident diabetes based on fasting glucose and American Diabetes Association criteria.

**RESULTS** — Fasting insulin was 19.7 pmol/l higher among nonobese (BMI <30 kg/m<sup>2</sup>) black women compared with white women (race and obesity interaction term,  $P < 0.01$ ). There were no differences among men. Among nonobese women, the relative risk for developing diabetes was similar between racial groups: 1.4 (95% CI 1.2–1.5) and 1.3 (1.2–1.4) per 60 pmol/l increase in insulin ( $P < 0.01$ ) for black and white women, respectively (interaction term,  $P = 0.6$ ). Findings were similar among men. Adjusting for established risk factors did not attenuate this association.

**CONCLUSIONS** — Nonobese black women have higher fasting insulin levels than nonobese white women, and fasting insulin is an equally strong predictor of diabetes in both groups. These results suggest one mechanism to explain the excess incidence of diabetes in nonobese black women but do not explain the excess among black men. Future research should evaluate additional factors: genetic, environmental, or the combination of both, which might explain higher fasting insulin among black women when compared with white women.

*Diabetes Care* 25:1358–1364, 2002

The excess prevalence of type 2 diabetes among black men and women when compared with white men and women is well documented (1–3), but explanations for these findings are limited. Physical inactivity, obesity, and

low socioeconomic status only partially explain the disparity (4), and the joint contribution of these and other potentially modifiable risk factors only account for about half of the excess risk (1). Both hyperinsulinemia, a marker for insulin re-

sistance, and obesity are established risk factors for type 2 diabetes (5).

In cross-sectional studies, black children and adults have higher levels of fasting insulin and a lower insulin sensitivity index than white people after adjustment for BMI (6–9). Whether this profile places black people at an increased risk of developing type 2 diabetes has not been evaluated. Recent research suggests that the elevated risk of diabetes for black people compared with white subjects is only present in individuals with lower BMIs (1,10). The objectives of this study were to explore whether a marker of insulin resistance, hyperinsulinemia, differs between black and white adults with lower BMIs and to determine whether hyperinsulinemia is an important predictor of diabetes among nonobese individuals in both racial groups.

## RESEARCH DESIGN AND METHODS

### Study population

This investigation was conducted in the Atherosclerosis Risk in Communities (ARIC) Study. A probability sample of black and white men and women aged 45–64 years was recruited from the metropolitan areas Forsyth County, NC, Washington County, MD, and Jackson, MS (black residents only) and from the suburbs of Minneapolis, MN. A detailed description of the response rates, study design, and methods is available (11). At baseline (1987–1989), 15,792 individuals were examined. Participants were excluded for the following reasons: neither black nor white race, missing insulin or BMI data, fasting for <8 h, prevalent diabetes, or BMI indicating underweight (<18.5 kg/m<sup>2</sup>). A total of 13,287 participants (1,930 black women, 5,395 white women, 1,205 black men, and 4,757 white men) were included in this analysis.

From the <sup>1</sup>Stanford Center for Research in Disease Prevention, Stanford University School of Medicine, Stanford, California; the <sup>2</sup>Biostatistics Branch, Health Effects Laboratory Division, National Institute for Occupational Safety and Health, Morgantown, West Virginia; and the <sup>3</sup>Welch Center for Prevention, Epidemiology, and Clinical Research, the Johns Hopkins Medical Institutions, Baltimore, Maryland.

Address correspondence and reprint requests to Dr. Mercedes Carnethon, Stanford Center for Research in Disease Prevention, Stanford University School of Medicine, 1000 Welch Rd., Palo Alto, CA 94304. E-mail: carnethon@stanford.edu.

Received for publication 17 January 2002 and accepted in revised form 29 April 2002.

**Abbreviations:** ARIC, Atherosclerosis Risk in Communities.

A table elsewhere in this issue shows conventional and Système International (SI) units and conversion factors for many substances.

## Data collection

Participants underwent clinical examinations at baseline and at three subsequent examinations on 3-year cycles (examination 2: 1990–1992; examination 3: 1993–1995; examination 4: 1996–1998). All measurements were collected according to standardized protocols common to all ARIC study sites (12).

Participants were asked to fast overnight (>8 h) before the clinic examination and to refrain from drinking alcohol and caffeine or smoking the day of the examination. Blood was drawn from seated participants and shipped to a central laboratory for assay. Serum insulin was measured by radioimmunoassay using an Insulin Kit (Cambridge Medical Diagnostics, Billerica, MA). Serum glucose was measured by a hexokinase/glucose-6-phosphate dehydrogenase method on a Coulter DACOS device. Homeostasis model assessment was calculated as the product of fasting insulin (microunits per milliliter) and fasting glucose (micromoles per liter) divided by 22.5 (13). Fasting serum insulin and homeostasis model assessment were used as markers of insulin resistance (14). Total cholesterol and triglycerides were measured in plasma with enzymatic methods. HDL cholesterol was measured after dextran-magnesium precipitation (15). Blood pressure was measured three times from seated participants; the average of the last two measurements was used in this study. Hypertension was defined as systolic blood pressure  $\geq 140$  mmHg, diastolic blood pressure  $\geq 90$  mmHg, or use of medications to lower blood pressure in the 2 weeks before the clinic examination.

BMI was calculated as the ratio of weight (kilograms) to standing height (meters) squared ( $\text{kg}/\text{m}^2$ ); participants with a BMI  $\geq 30$  were classified as obese. To calculate waist-to-hip ratio, waist girth was measured at the umbilicus, and hip girth was measured as the largest diameter around the gluteal muscles.

Type 2 diabetes was defined according to the American Diabetes Association criteria (16) as any of the following: a fasting serum glucose level of 7 mmol/l ( $\geq 126$  mg/dl), a nonfasting glucose level  $\geq 11.1$  mmol/l (200 mg/dl), self-reported use of medications for diabetes, or a self-reported previous physician diagnosis. Participants who were diagnosed with diabetes at examinations 2, 3, or 4 were considered to have incident diabetes.

Follow-up time was calculated as the difference between the dates of clinic examination at diagnosis and the baseline clinic examination.

Age, race, sex, education level, physical activity, and diet were assessed at baseline. Education was categorized based on the highest grade level completed, and participants with less than a high school education (grade 12) were compared with participants with a high school education or higher. Alcohol consumption was categorized as current, former, or never. Current cigarette smokers were compared with participants who smoked  $< 100$  cigarettes in a lifetime. The modified questionnaire by Baecke et al. (17) was used to assess leisure time physical activity (e.g., gardening) and sports-related physical activity (e.g., jogging) on a five-point scale from one (low) to five (high). The modified 61-item food frequency questionnaire by Willett et al. (18) was used to assess diet. Prevalent coronary heart disease was defined as a history of coronary artery bypass surgery, balloon angioplasty, or myocardial infarction based on electrocardiograph or physician diagnosis (19). Medication use was identified and defined by coding all reported medications, vitamins, and supplements used in the 2 weeks before the clinic examination.

## Statistical analysis

All analyses were performed separately by sex. The distribution of baseline characteristics was compared by race using *t* tests (means) and  $\chi^2$  tests (proportions). The distribution of insulin was skewed so values were log-transformed for analyses and back-transformed to geometric means for presentation. BMI was divided into six categories: 18.5 to  $< 22$ , 22 to  $< 25$ , 25 to  $< 28$ , 28 to  $< 31$ , 31 to  $< 34$ , and  $\geq 34$   $\text{kg}/\text{m}^2$ . Means of fasting insulin (95% CI) by racial group and BMI category were calculated from an ANOVA model including an interaction term between race and BMI category. In a separate model, the interaction between race and obesity (BMI  $\geq 30$   $\text{kg}/\text{m}^2$ ) was examined. All models were adjusted for BMI as a continuous variable.

Incidence rates of diabetes (per 1,000 person-years) and incident rate ratios were calculated using Poisson regression. Cox proportional hazards regression models (adjusted for discrete failure time) were used to estimate the relative risk of

incident diabetes by insulin level and racial group (20). To test our a priori hypothesis that the relationship between fasting insulin and incident diabetes differed between nonobese black and white participants, an interaction term between race and fasting insulin was entered into the regression models. A significant change in the maximum likelihood  $\chi^2$  indicated statistical interaction.

The role of covariates on the relationship between fasting insulin and incident diabetes was evaluated by entering covariates into regression models. A change in the relative risk for insulin of  $> 10\%$  was accepted as an indication of a statistically important confounder. To account for multiple testing, statistical significance was denoted at  $P < 0.01$ . All analyses were performed using SAS version 8.1 (SAS Institute, Cary, NC).

**RESULTS** — At baseline, a higher proportion of black women had less than a high school education, their mean caloric intake was higher, their physical activity levels were lower, and their prevalence of hypertension was nearly double that of white women (Table 1). Black women were twice as likely to be obese than white women, and mean fasting insulin was significantly higher. The same characteristics differed significantly between black and white men, with the notable exceptions of BMI and insulin.

## Fasting insulin by race and BMI

In each category of BMI, black women had higher fasting insulin than white women (race and BMI category interaction term,  $P = 0.0003$ ) (Fig. 1A). In individuals with BMIs from 22 to 31  $\text{kg}/\text{m}^2$ , differences in mean insulin were 15–20 pmol/l higher in black women than in white women. In the highest BMI category ( $\geq 34$   $\text{kg}/\text{m}^2$ ), means of insulin converged (absolute difference 5.8 pmol/l, black versus white) and 95% CIs overlapped, suggesting little difference between racial groups. Differences in fasting insulin when comparing obese (BMI  $\geq 30$   $\text{kg}/\text{m}^2$ ) and nonobese (BMI  $< 30$   $\text{kg}/\text{m}^2$ ) black and white women were also highly significant (race and obesity interaction term,  $P < 0.0001$ ). Mean fasting insulin was 19.7 pmol/l higher among nonobese black women and 7.5 pmol/l higher among obese black women compared with white women.

Table 1—Baseline covariates by race and sex

| Covariate                                          | Women           |                 |         | Men             |                 |         |
|----------------------------------------------------|-----------------|-----------------|---------|-----------------|-----------------|---------|
|                                                    | Black           | White           | P*      | Black           | White           | P*      |
| n                                                  | 1,930           | 5,395           | —       | 1,205           | 4,757           | —       |
| Age (years)                                        | 52.9 ± 5.7      | 53.8 ± 5.7      | <0.0001 | 53.7 ± 6.0      | 54.7 ± 5.7      | <0.0001 |
| Education (% with less than high school education) | 37.0            | 15.3            | <0.0001 | 42.5            | 17.3            | <0.0001 |
| Current alcohol drinker (%)                        | 23.2            | 62.4            | <0.0001 | 51.6            | 70.0            | <0.0001 |
| Current smoker (%)                                 | 25.5            | 25.0            | 0.6461  | 38.4            | 24.4            | <0.0001 |
| % Calories from carbohydrates                      | 50.9 ± 9.3      | 49.6 ± 9.4      | <0.0001 | 48.8 ± 9.3      | 47.5 ± 9.1      | <0.0001 |
| % Calories from total fat                          | 31.9 ± 6.3      | 32.7 ± 6.9      | <0.0001 | 31.9 ± 6.2      | 33.5 ± 6.8      | <0.0001 |
| Dietary fiber (g)                                  | 16.1 ± 8.3      | 17.3 ± 7.9      | <0.0001 | 16.1 ± 8.2      | 17.7 ± 8.2      | <0.0001 |
| Total kcal                                         | 1,567.7 ± 755.4 | 1,497.6 ± 569.0 | 0.0002  | 1,772.7 ± 779.1 | 1,794.6 ± 727.3 | 0.3740  |
| Physical activity sport score†                     | 2.1 ± 0.7       | 2.4 ± 0.8       | <0.0001 | 2.3 ± 0.7       | 2.7 ± 0.8       | <0.0001 |
| Leisure-time physical activity score†              | 2.1 ± 0.6       | 2.5 ± 0.5       | <0.0001 | 2.1 ± 0.6       | 2.4 ± 0.5       | <0.0001 |
| BMI (kg/m <sup>2</sup> )                           | 30.2 ± 6.5      | 26.2 ± 5.2      | <0.0001 | 27.2 ± 4.7      | 27.2 ± 3.9      | 0.9614  |
| Obese (BMI >30 kg/m <sup>2</sup> )                 | 44.4            | 20.6            | <0.0001 | 24.3            | 20.1            | 0.0015  |
| Waist-to-hip ratio                                 | 0.895 ± 0.08    | 0.886 ± 0.08    | <0.0001 | 0.935 ± 0.05    | 0.966 ± 0.05    | <0.0001 |
| Insulin (pmol/l)                                   | 104.6 ± 74.2    | 66.9 ± 50.2     | <0.0001 | 80.6 ± 59.2     | 79.3 ± 56.3     | 0.5581  |
| Glucose (mg/dl)                                    | 98.2 ± 10.1     | 96.7 ± 8.7      | <0.0001 | 99.4 ± 10.1     | 100.8 ± 8.9     | <0.0001 |
| Homeostasis model assessment*                      | 67.6 ± 52.6     | 42.4 ± 34.9     | <0.0001 | 52.6 ± 41.4     | 52.1 ± 39.6     | 0.2249  |
| Total cholesterol (mmol/l)                         | 3.9 ± 1.4       | 4.0 ± 1.5       | 0.1615  | 5.4 ± 1.1       | 5.5 ± 1.0       | 0.7606  |
| HDL cholesterol (mmol/l)                           | 1.5 ± 0.5       | 1.5 ± 0.4       | 0.0110  | 1.3 ± 0.4       | 1.1 ± 0.3       | <0.0001 |
| Triglycerides (mmol/l)                             | 1.1 ± 0.6       | 1.4 ± 0.8       | <0.0001 | 1.3 ± 0.9       | 1.6 ± 1.0       | <0.0001 |
| Fibrinogen (mg/dl)                                 | 297.2 ± 59.4    | 323.0 ± 69.3    | <0.0001 | 293.0 ± 61.8    | 305.0 ± 68.9    | <0.0001 |
| Hypertension‡                                      | 52.4            | 23.9            | <0.0001 | 51.8            | 26.0            | <0.0001 |
| Prevalent coronary heart disease§                  | 1.9             | 1.6             | 0.2828  | 4.3             | 8.0             | <0.0001 |

Data are means ± SD unless otherwise indicated. \*Insulin × glucose/22.5; †Baecke index; ‡systolic/diastolic blood pressure >140/90 mmHg, antihypertensive medication use, or diagnosis of hypertension; §coronary heart disease; myocardial infarction, balloon angioplasty, bypass surgery, electrocardiographic changes, or physician diagnosis. P values were from  $\chi^2$  test of proportions and t test of means.

Mean fasting insulin was similar among black and white men at each BMI category (Fig. 1B). Neither the interaction term for race and the six-level BMI category nor the term for race and obesity was significant (BMI categories,  $P = 0.2620$ ; obesity,  $P = 0.5120$ ). Therefore, all modeling of the relationship between fasting insulin and diabetes was restricted to women.

### Incident diabetes

Over an average of 8.7 years of follow-up (SD 1.9), 750 women (10.2%) and 729 men (12.4%) were diagnosed with diabetes. In the full sample of women, the incidence rate ratio was double among black women compared with white women. This pattern was equally strong in nonobese women but less so in obese women (Table 2). The magnitude of the racial difference was slightly smaller among all men and nonobese men compared with women, and the rate of diabetes did not differ between obese black and white men.

Among nonobese women, the risk of developing diabetes was 1.37 (95% CI 1.22–1.54) for a 1-SD increase in insulin (60 pmol/l) for black women and 1.32 (1.24–1.41) for white women. This association was homogeneous by racial group ( $\chi^2 = 0.24$ ,  $P = 0.6273$ ). Similarly, the association between insulin and incident diabetes did not differ between black (1.21 [95% CI: 1.02–1.44]) and white (1.33 [1.26–1.40]) nonobese men ( $\chi^2 = 1.16$ ,  $P = 0.2811$ ). There was a positive monotonic relationship between fasting insulin and the relative risk of developing diabetes for both black and white women (Fig. 2A) and men (Fig. 2B).

In the absence of interaction between race and insulin among nonobese women and men, racial groups were pooled. We evaluated demographic (race, age, and education), dietary (% total calories from carbohydrates, dietary fiber), and physical activity as potential confounders of the relationship between insulin and incident diabetes. No variables were confounders according to the criteria of a 10% change

in either sex. The pooled relative risk of developing diabetes did not change by >1% with the inclusion of any of the covariates entered singly or in groups into the models for women (1.31 [95% CI 1.26–1.36]) or men (1.31 [1.24–1.38]) per SD increase in insulin.

**CONCLUSIONS**— In this population-based sample, nonobese black women, previously thought to be at a lower risk for developing diabetes (compared with their obese counterparts), demonstrated evidence of insulin resistance. Among nonobese women, the magnitude of association between hyperinsulinemia and diabetes was statistically equivalent between black and white women.

In the National Health and Nutrition Examination Survey (NHANES) I, Epidemiologic Follow-Up Study, the incidence of diabetes is only elevated in nonobese (BMI <30 kg/m<sup>2</sup>) black adults compared with white adults, but also the risk of diabetes is equivalent between races among

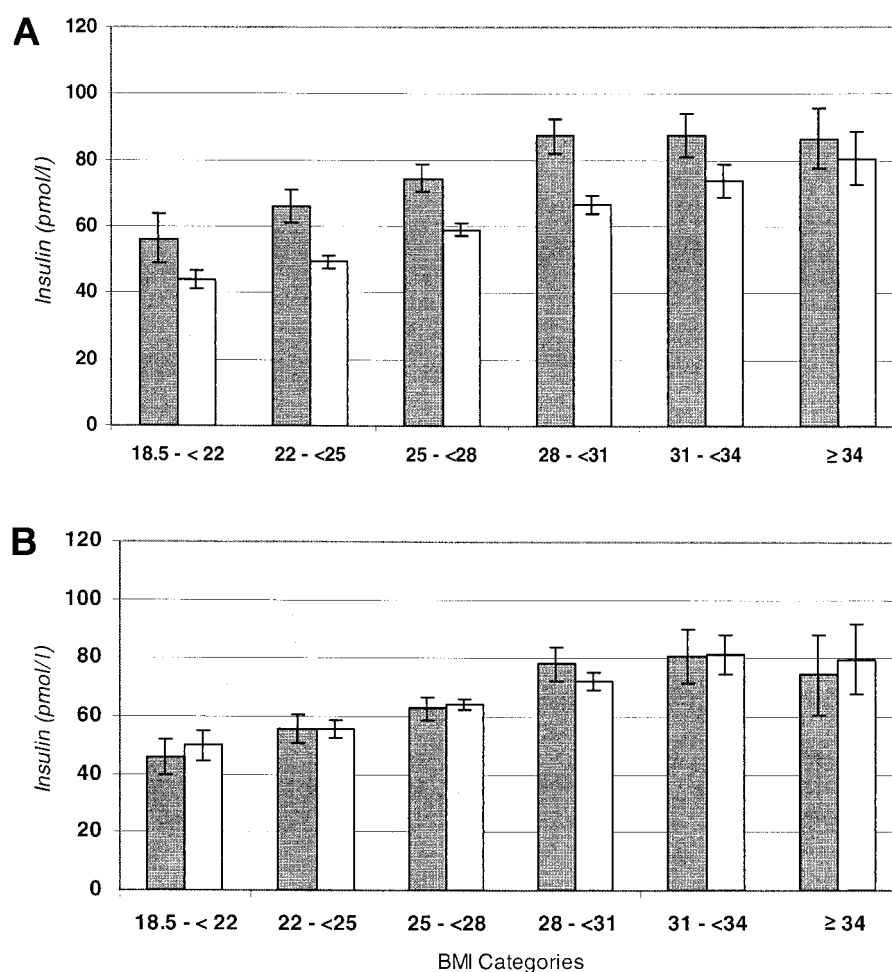

**Figure 1**—Adjusted\* means and 95% CIs of insulin by racial group: the ARIC Study, 1987–1989. A: Women (P value from race  $\times$  BMI interaction term = 0.0003). B: Men (P value from race  $\times$  BMI category interaction term = 0.2620). \*Adjusted for BMI (per 1 unit). ■, Black subjects; □, white subjects.

the people who are not obese (BMI  $\leq 30$  kg/m<sup>2</sup>) (10). The authors suggest that greater visceral adiposity at a lower BMI in black adults may explain this association. However, previous research in this sample (21) and others (6) does not support this theory. In our sample, waist-to-hip ratio was smaller among black men and women compared with their white counterparts at lower body weights (data not shown). This finding suggests that another mechanism may be responsible for the racial disparity in diabetes incidence at lower body weights.

Previous research detected higher insulin among black children compared with white children (6–9,22). In a study of 73 black and white children (5–10 years old), fasting and postchallenge insulin was higher among black children even after total body fat, intra-abdominal fat, and subcutaneous fat were controlled

(7). In the Insulin Resistance and Atherosclerosis Study, black adults aged 40–69 years demonstrated evidence of insulin resistance when compared with white adults at a similar body weight, independent of diabetes status (9,22). Lovejoy et al. (6) confirmed these results in a small ( $n = 59$ ) sample of black and white women. Thus, in this large population, evidence of insulin resistance at a lower body weight in black women confirms previous research.

Each of the above-mentioned studies reports effects in both men and women. The sample presented by Lovejoy et al. (6) was restricted to women, whereas Gower et al. (7) and Karter et al. (9) demonstrated differences in both sexes, and Haffner et al. (22) controlled for sex in their analysis. We did not have an a priori hypothesis that the relationship between body weight and insulin would differ by

sex. Rather, our decision was prompted by racial differences in energy expenditure, metabolism, and other factors associated with high insulin that may be more pronounced among women.

In a national sample, the proportion of physically inactive women was higher among black and Hispanic women than among white women (23). Weyer et al. (24) found that sleeping metabolic rate and 24-h energy expenditure was lower among black women compared with white women; less noticeable differences were detected among men. The striking excess of obesity among U.S. black women compared with white women (25) and the absence of such a difference between black and white men (26) may be a manifestation of these differences.

Interpreting differences in disease risk by race is complicated because of the close relationship between socioeco-

Table 2—Incidence of type 2 diabetes by race and obesity

|                                                 |                  |                  | Nonobese         |                | Obese            |                  |
|-------------------------------------------------|------------------|------------------|------------------|----------------|------------------|------------------|
|                                                 | Black            | White            | Black            | White          | Black            | White            |
| Women                                           |                  |                  |                  |                |                  |                  |
| Individuals at risk (n)                         | 1,929            | 5,395            | 1,063            | 4,267          | 866              | 1,128            |
| Person-years of follow-up                       | 16,000           | 47,966           | 9,022            | 38,384         | 6,978            | 9,582            |
| Incident cases of diabetes                      | 315              | 435              | 118              | 229            | 197              | 206              |
| Incidence rate per 1,000 person-years (95% CI)  | 19.6 (15.5–24.9) | 9.1 (8.3–10.0)   | 13.0 (9.1–18.5)  | 6.0 (5.2–6.8)  | 28.2 (20.3–39.3) | 21.5 (18.8–24.6) |
| Incidence rate ratio (black vs. white) (95% CI) | 2.17 (1.87–2.50) | —                | 2.18 (1.74–2.72) | —              | 1.31 (1.08–1.60) | —                |
| P                                               | <0.0001          |                  | <0.0001          |                | 0.0063           |                  |
| Men                                             |                  |                  |                  |                |                  |                  |
| Individuals at risk (n)                         | 1,205            | 4,757            | 908              | 3,797          | 297              | 960              |
| Person-years of follow-up                       | 9,775            | 40,839           | 7,458            | 33,164         | 2,317            | 7,674            |
| Incident cases of diabetes                      | 178              | 561              | 99               | 326            | 79               | 235              |
| Incidence rate per 1,000 person-years (95% CI)  | 18.0 (14.0–23.1) | 13.7 (12.6–14.9) | 13.0 (9.3–18.2)  | 9.8 (8.8–11.0) | 34.1 (23.3–50.0) | 30.6 (26.9–34.8) |
| Incidence rate ratio (black vs. white) (95% CI) | 1.31 (1.10–1.55) | —                | 1.33 (1.06–1.66) | —              | 1.11 (0.86–1.44) | —                |
| P                                               | 0.0018           |                  | 0.0141           |                | 0.4088           |                  |

Obesity = BMI  $\geq 30$  kg/m<sup>2</sup>.

nomic status and race (27). In this sample, there were marked socioeconomic differences as measured by education between black and white participants (Table 1). Less educated individuals may be more likely to engage in detrimental health behaviors, which may place them at increased risk for disease. However, previous research has shown that the racial disparity in diabetes cannot be explained fully by differences in socioeconomic status (4). Similarly, in this study, adjustment for education, physical activity, and dietary components does not attenuate the relationship between race or high fasting insulin and diabetes. Any epidemiologic study is limited in its ability to accurately measure socioeconomic status; thus, the possibility of residual confounding remains. However, given the consistency of these results across other study populations (6–9,22), it is equally plausible that there is a real biologic or genetic basis for sus-

ceptibility to insulin resistance in black women that should be investigated.

Primary strengths of this study include the large population sample, the longitudinal design, and the ability to assess the risk of developing diabetes among individuals with a combination of baseline risk factors. However, some potential limitations may affect these results. This epidemiologic study was restricted to a surrogate marker of insulin resistance: fasting insulin. In previous research, fasting insulin was highly correlated with Bergman's insulin sensitivity index (Spearman's  $r = \sim 0.6$ ) in people free of diabetes (14). At the time of insulin measurement, our sample was restricted to individuals without diabetes.

The possibility of geographic confounding by race arises in this study because the majority of black participants (89%) are from one study site: Jackson, MS. To address this concern, we conducted a secondary analysis that re-

stricted comparisons to the Forsyth County, NC, site, which includes both black ( $n = 374$ , 59% women) and white ( $n = 3,148$ , 54% women) participants. The direction of the association was similar for all analyses, although the ability to ascertain statistical significance was limited because of sample size.

Because hyperinsulinemia is an equally strong predictor of diabetes in both racial groups, increased susceptibility to insulin resistance in black women may be one explanation for the excess incidence of diabetes in nonobese black women. However, hyperinsulinemia among nonobese black men is not a likely explanation for the excess risk in that group compared with white men; sex differences in the relationship between obesity and insulin resistance should be investigated. Future research should evaluate whether additional factors—genetic, environmental, or the combination of both—explain higher fasting insulin lev-

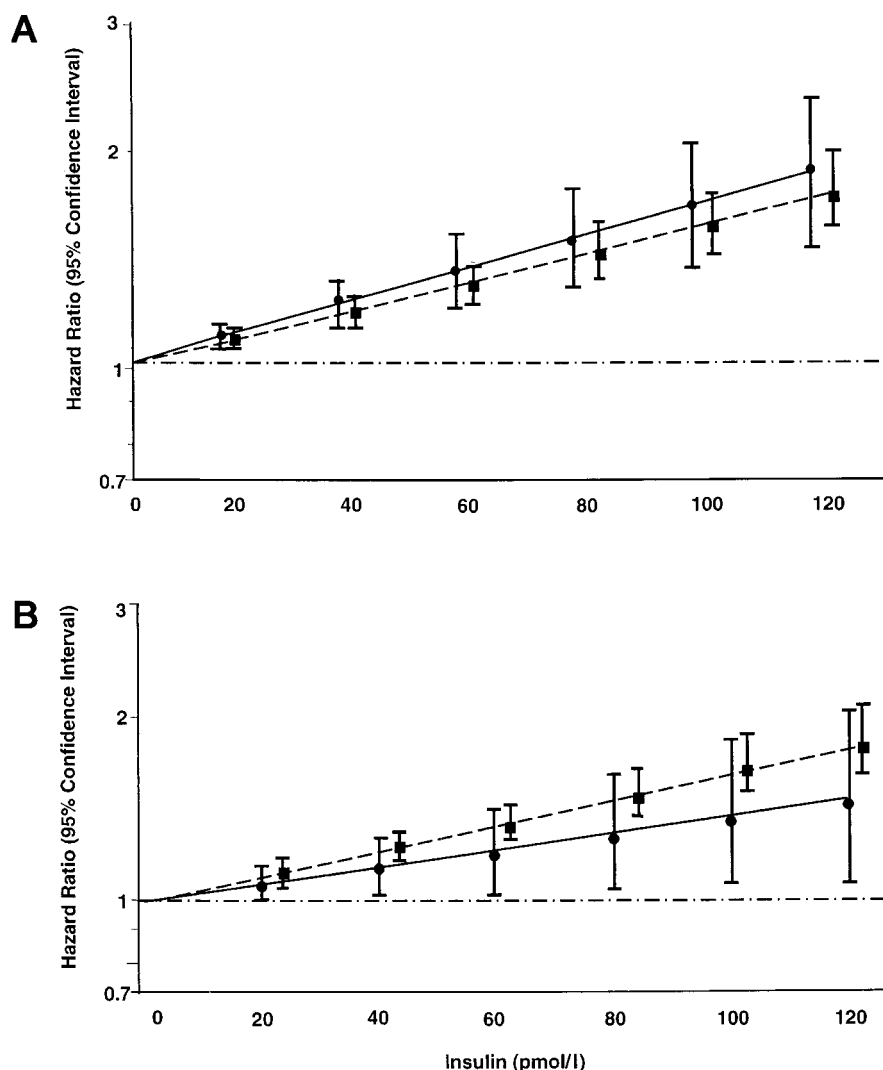

**Figure 2**—Adjusted\* hazard ratios and 95% CIs of incident type 2 diabetes by fasting insulin among nonobese women (A) and men (B). \*Adjusted for BMI. P value for race  $\times$  insulin interaction term for women = 0.6273 and men = 0.2811. ■, white subjects; ●, black subjects.

els among black women compared with white women, independent of obesity, and whether insulin-sensitizing therapies and behavioral modifications are effective in reducing the burden of type 2 diabetes among black women.

**Acknowledgments**—This study was supported by National Heart, Lung, and Blood Institute (NHLBI) ARIC Contracts N01-HC-55015, N01-HC-55016, N01-HC-55018, N01-HC-55019, N01-HC-55020, N01-HC-55021, and N01-HC-55022 and by National Institutes of Health/NHLBI NRSA (National Research Service Award) Training Grant 5T32HL07034-26.

The authors thank the staff and participants in the ARIC Study for their important contributions.

## References

1. Brancati FL, Kao WHL, Folsom AR, Watson RL, Szklo M: Incident type 2 diabetes mellitus in African American and white adults: the Atherosclerosis Risk in Communities Study. *JAMA* 283:2253–2259, 2000
2. Harris MI, Flegal KM, Cowie CC, Eberhardt MS, Goldstein DE, Little RR, Wiedmeyer H-M, Byrd-Holt DD: Prevalence of diabetes, impaired fasting glucose, and impaired glucose tolerance in U.S. Adults: the Third National Health and Nutrition Examination Survey 1988–1994. *Diabetes Care* 21:518–524, 1998
3. Cowie CC, Harris MI, Silverman RE, Johnson EW, Rust KF: Effect of multiple risk factors on differences between blacks and whites in the prevalence of non-insulin-dependent diabetes mellitus in the United States. *Am J Epidemiol* 137:719–732, 1993
4. Brancati FL, Whelton PK, Kuller LH, Klag MJ: Diabetes mellitus, race, and socioeconomic status: a population-based study. *Ann Epidemiol* 6:67–73, 1996
5. Haffner SM: Epidemiology of type 2 diabetes: risk factors. *Diabetes Care* 21 (Suppl. 3):C3–C6, 1998
6. Lovejoy JC, de la Bretonne JA, Klemperer M, Tulley R: Abdominal fat distribution and metabolic risk factors: effects of race. *Metabolism* 45:1119–1124, 1996
7. Gower B, Nagy T, Trowbridge C, Dezenberg C, Goran M: Fat distribution and insulin response in prepubertal African American and white children. *Am J Clin Nutr* 67:821–827, 1998
8. Nabulsi AA, Folsom AR, Heiss G, Weir SS, Chambless LE, Watson RL, Eckfeldt JH:

- Fasting hyperinsulinemia and cardiovascular disease risk factors in nondiabetic adults: stronger associations in lean versus obese subjects. *Metabolism* 44:914–922, 1995
9. Karter AJ, Mayer-Davis EJ, Selby JV, D'Agostino RB Jr, Haffner SM, Sholinsky P, Bergman R, Saad MF, Hamman RF: Insulin sensitivity and abdominal obesity in African-American, Hispanic, and non-Hispanic white men and women: the Insulin Resistance and Atherosclerosis Study. *Diabetes* 45:1547–1555, 1996
10. Resnick HE, Valsania P, Halter JB, Lin X: Differential effects of BMI on diabetes risk among black and white Americans. *Diabetes Care* 21:1828–1835, 1998
11. ARIC Investigators: The Atherosclerosis Risk in Communities (ARIC) Study: design and objectives. *Am J Epidemiol* 129: 687–699, 1989
12. National Heart Lung and Blood Institute: *Manual 1: General Description and Study Management*. Version 3.0. Chapel Hill, NC, School of Public Health, University of North Carolina ARIC Coordinating Center, 1997
13. Matthews DR, Hosker JP, Rudenski AS, Naylor BA, Treacher DF, Turner RC: Homeostasis model assessment: insulin resistance and beta-cell function from fasting plasma glucose and insulin concentrations in man. *Diabetologia* 28:412–419, 1985
14. Howard G, Bergman R, Wagenknecht LE, Haffner SM, Savage PJ, Saad MF, Laws A, D'Agostino RB Jr: Ability of alternative indices of insulin sensitivity to predict cardiovascular risk: comparison with the “minimal model” Insulin Resistance Atherosclerosis Study (IRAS) Investigators. *Ann Epidemiol* 8:358–369, 1998
15. National Heart Lung and Blood Institute: *Manual 8: Lipid and Lipoprotein Determinations*. Version 1.0. Chapel Hill, NC, ARIC Coordinating Center, School of Public Health, University of North Carolina, 1987
16. Expert Committee on the Diagnosis and Classification of Diabetes Mellitus: Report of the Expert Committee on the Diagnosis and Classification of Diabetes Mellitus. *Diabetes Care* 20:1183–1197, 1997
17. Baecke J, Burema J, Frijters J: A short questionnaire for the measurement of habitual physical activity in epidemiologic studies. *Am J Clin Nutr* 36:936–942, 1982
18. Willett WC, Sampson L, Stampfer MJ, Rosner B, Bain C, Witschi J, Hennekens CH, Speizer FE: Reproducibility and validity of a semiquantitative food frequency questionnaire. *Am J Epidemiol* 122:51–65, 1985
19. National Heart Lung and Blood Institute: *Manual 3: Surveillance Component Procedures*. Version 4.0. Chapel Hill, NC, ARIC Coordinating Center, School of Public Health, University of North Carolina, 1997
20. Cox DR: Regression models and life tables. *J Royal Stat Soc B34*:187–220, 1972
21. Duncan BB, Chambless LE, Schmidt MI, Szklo M, Folsom AR, Carpenter MA, Crouse JR: Correlates of body fat distribution: variation across categories of race, sex, and body mass in the atherosclerosis risk in communities study: the Atherosclerosis Risk in Communities (ARIC) Study Investigators. *Ann Epidemiol* 5:192–200, 1995
22. Haffner SM, D'Agostino R Jr, Saad MF, Rewers M, Mykkanen L, Selby J, Howard G, Savage PJ, Hamman RF, Wagenknecht LE, Bergman RN: Increased insulin resistance and insulin secretion in nondiabetic African-American and Hispanics compared with non-Hispanic whites: the Insulin Resistance and Atherosclerosis Study. *Diabetes* 45: 742–748, 1996
23. Winkleby MA, Kraemer HC, Ahn DK, Varady AN: Ethnic and socioeconomic differences in cardiovascular disease risk factors: findings for women from the Third National Health and Nutrition Examination Survey, 1988–1994. *JAMA* 280:356–362, 1998
24. Weyer C, Snitker S, Bogardus C, Ravussin E: Energy metabolism in African Americans: potential risk factors for obesity. *Am J Clin Nutr* 70:13–20, 1999
25. Must A, Spadano J, Coakley EH, Field AE, Colditz G, Dietz WH: The disease burden associated with overweight and obesity. *JAMA* 282:1523–1529, 1999
26. Kumanyika S: Obesity in minority populations: an epidemiologic assessment. *Obes Res* 2:166–182, 1994
27. Krieger N: Analyzing socioeconomic and racial/ethnic patterns in health and health care. *Am J Public Health* 83:1086–1087, 1993
